# Supplementary material for: Long non-coding RNA ROR decoys gene-specific histone methylation to promote tumorigenesis
Source: PubMed Central journal article supplement (PMC4499915; doi:10.1186/s13059-015-0705-2), 2015-07-14
Supplement: 13059_2015_705_MOESM3_ESM.pdf [file 13059_2015_705_MOESM3_ESM.pdf]

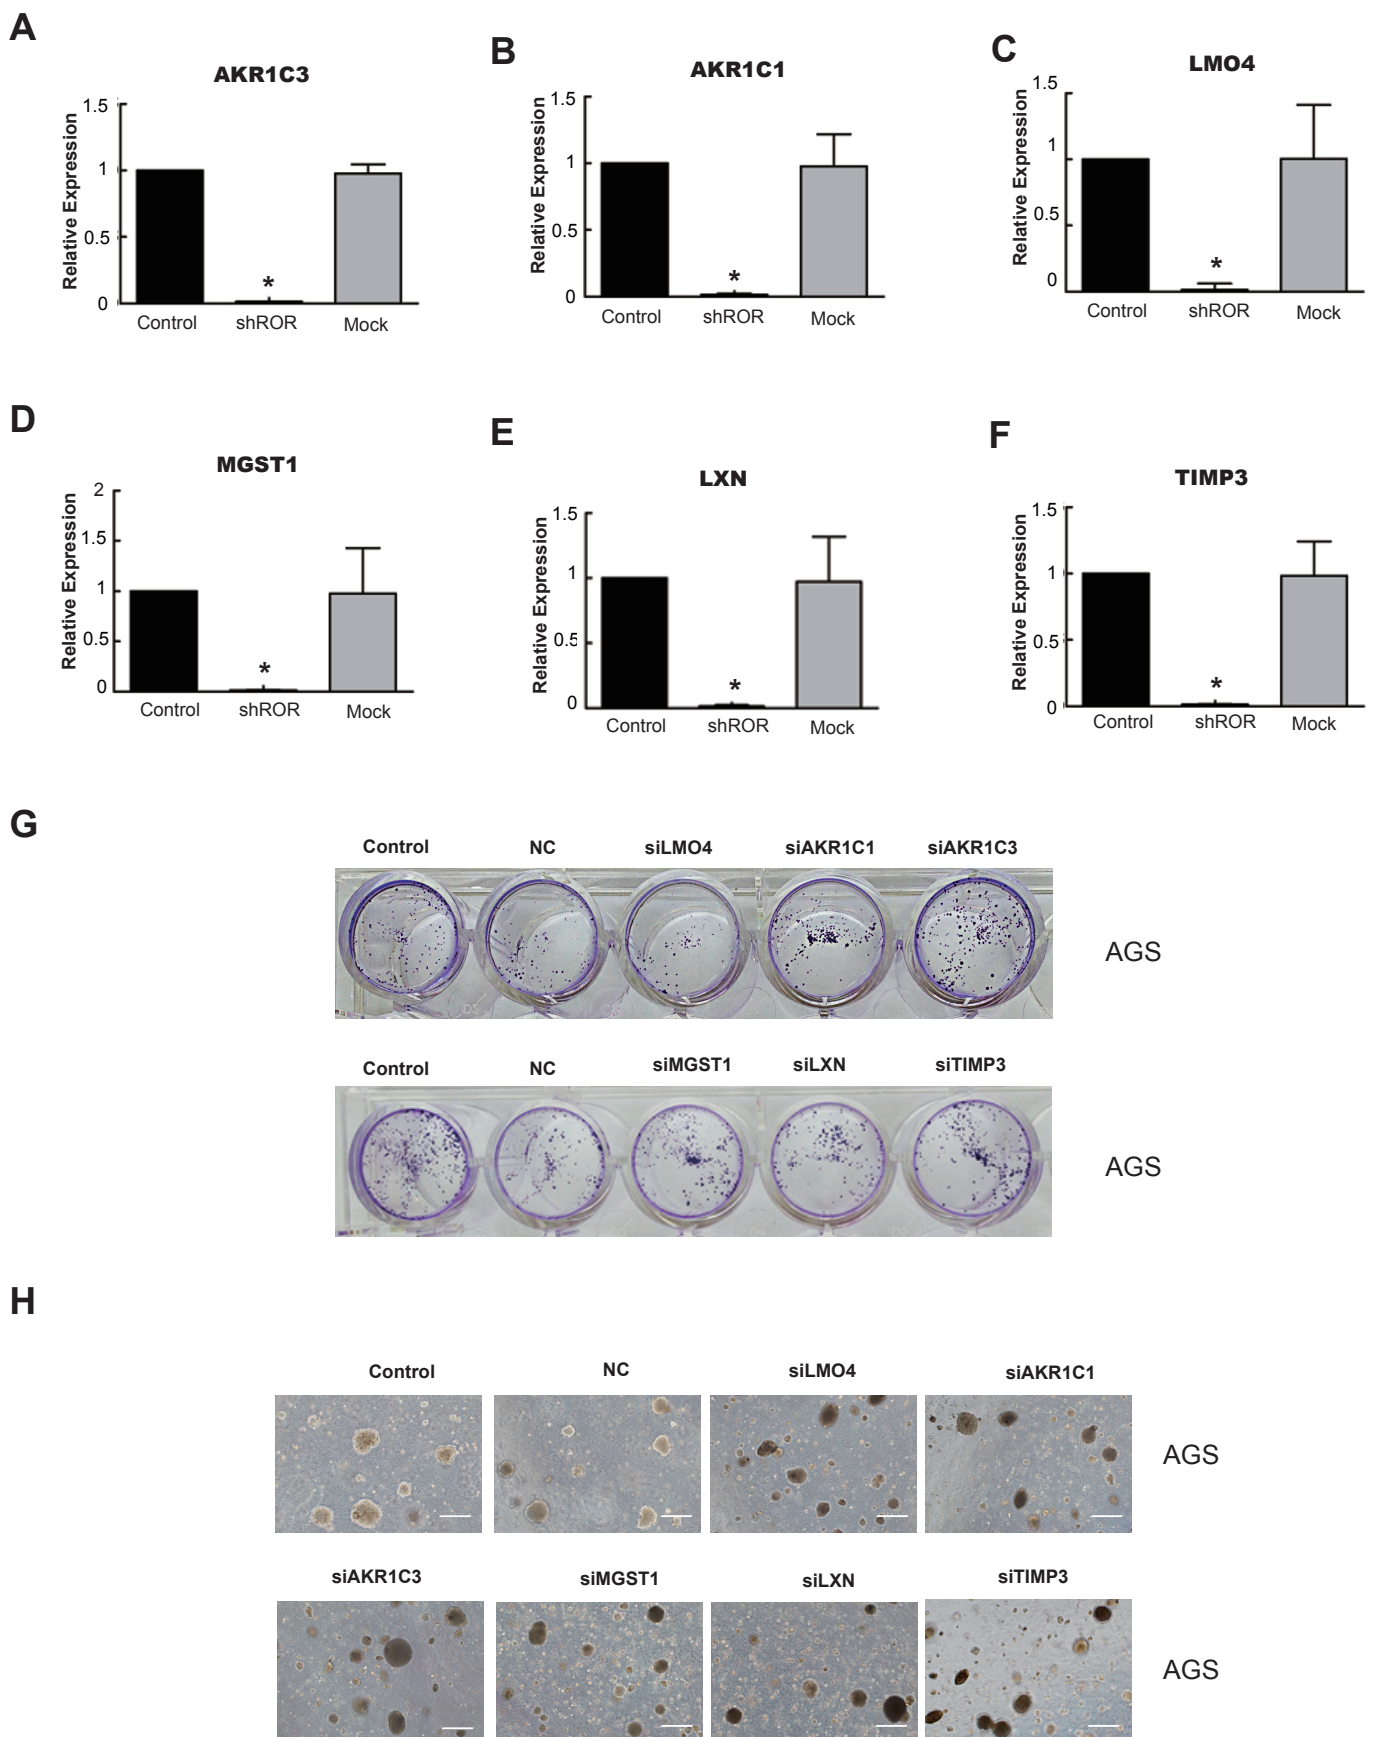

**Supplementary Figure 2 Selected altered genes in *RoR* silencing tumor cells**
