# Supplementary material for: Long non-coding RNA ROR decoys gene-specific histone methylation to promote tumorigenesis
Source: PubMed Central journal article supplement (PMC4499915; doi:10.1186/s13059-015-0705-2), 2015-07-14
Supplement: 13059_2015_705_MOESM6_ESM.pdf [file 13059_2015_705_MOESM6_ESM.pdf]

**A**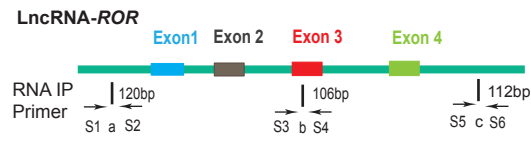**B**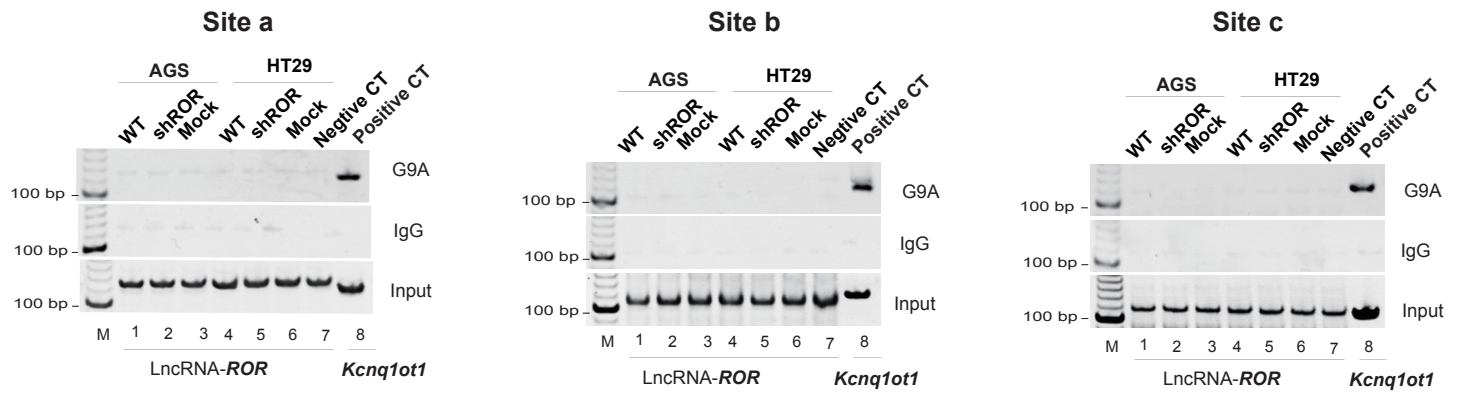

**Supplementary Figure 4 ROR Failed to bind with G9A protein**
